# Supplementary material for: Interlayer-expanded MWW-type zeolite catalysts with carbon filler in expanded micropores for efficient microwave heating
Source: Royal Society of Chemistry journal article supplement (doi:10.1039/d2ta01602h), 2022-01-01
Supplement: d2ta01602h1.pdf [file d2ta01602h1.pdf]

## Supplementary Information

### Interlayer-expanded MWW-type zeolite catalysts with carbon filler in expanded micropores for efficient microwave heating

Masaki Okamoto,<sup>\*a</sup> Takahiro Sakatsume<sup>b</sup>, Shuntaro Tsubaki<sup>c</sup> and Yuji Wada<sup>d</sup>

<sup>a</sup> Research and Education Center for Natural Sciences, Keio University, Yokohama, Kanagawa 223-8521, Japan.

E-mail: okamoto.m@keio.jp

<sup>b</sup> School of Materials and Chemical Technology, Tokyo Institute of Technology, Meguro-ku, Tokyo 152-8552, Japan

<sup>c</sup> Graduate School of Bioresource and Bioenvironmental Science, Kyushu University, Fukuoka, Fukuoka 819-0395, Japan

<sup>d</sup> Institute of Innovative Research, Tokyo Institute of Technology, Yokohama, Kanagawa 226-8503, Japan

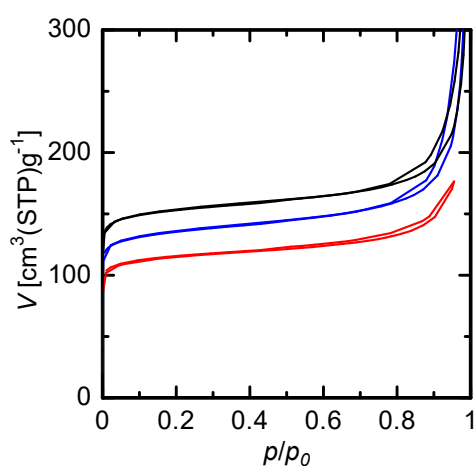

**Fig. S1** Nitrogen adsorption–desorption isotherms of MWW (blue), exp-MWW (black), and C@exp-MWW (red).

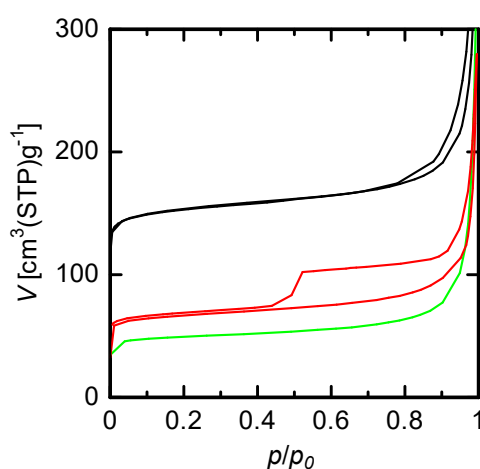

**Fig. S2** Nitrogen adsorption–desorption isotherms of exp-MWW (black), Ph-C@exp-MWW (green) and FA-C@exp-MWW (red).

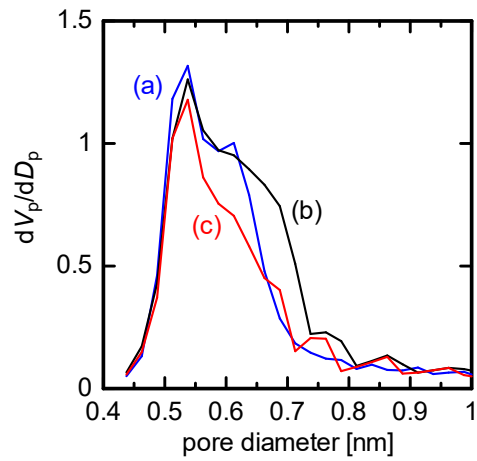

**Fig. S3** Pore size distributions of MWW (a), exp-MWW (b) and C@exp-MWW (c).

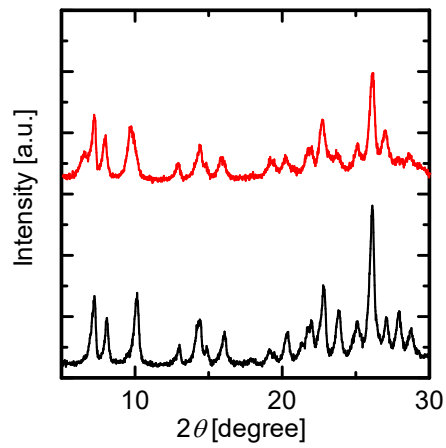

**Fig. S4** X-ray diffraction (XRD) patterns of H-exp-MWW (black) and H-C@exp-MWW (red).

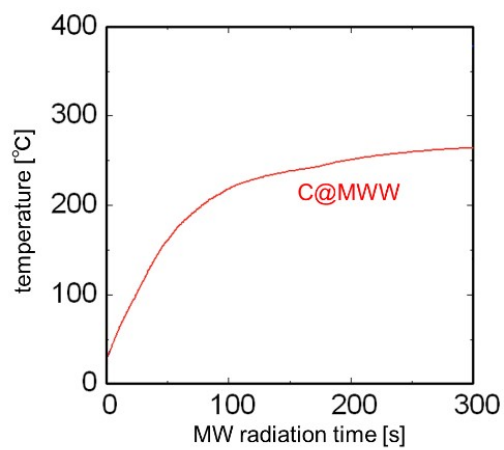

**Fig. S5** Temperature of one of C@ MWWs heated by MW radiation.
